# Supplementary figures and images for: Subcutaneous Immunization of Leishmania HSP70-II Null Mutant Line Reduces the Severity of the Experimental Visceral Leishmaniasis in BALB/c Mice
Source: MDPI journal article supplement (doi:10.3390/vaccines8010141), 2020-03-23

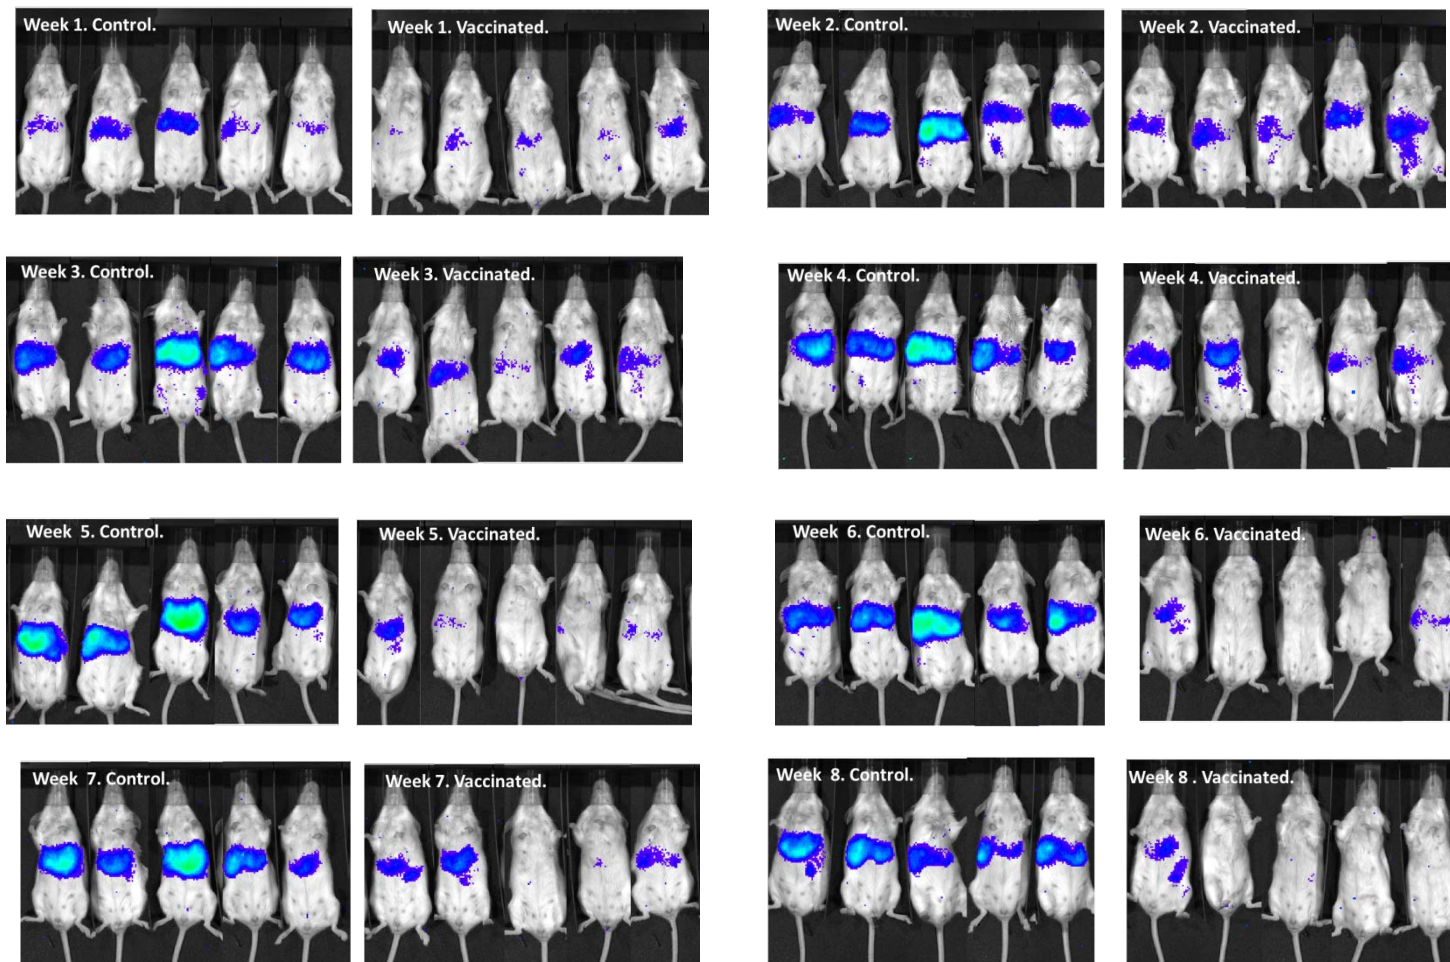

Luminescence

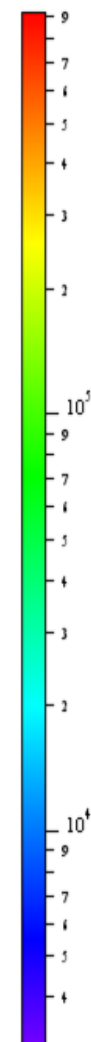

Radiance  
(p/sec/cm<sup>2</sup>/sr)

Color Scale  
Min = 3.09e3  
Max = 9.26e5

Supplement: s1 [file s1]

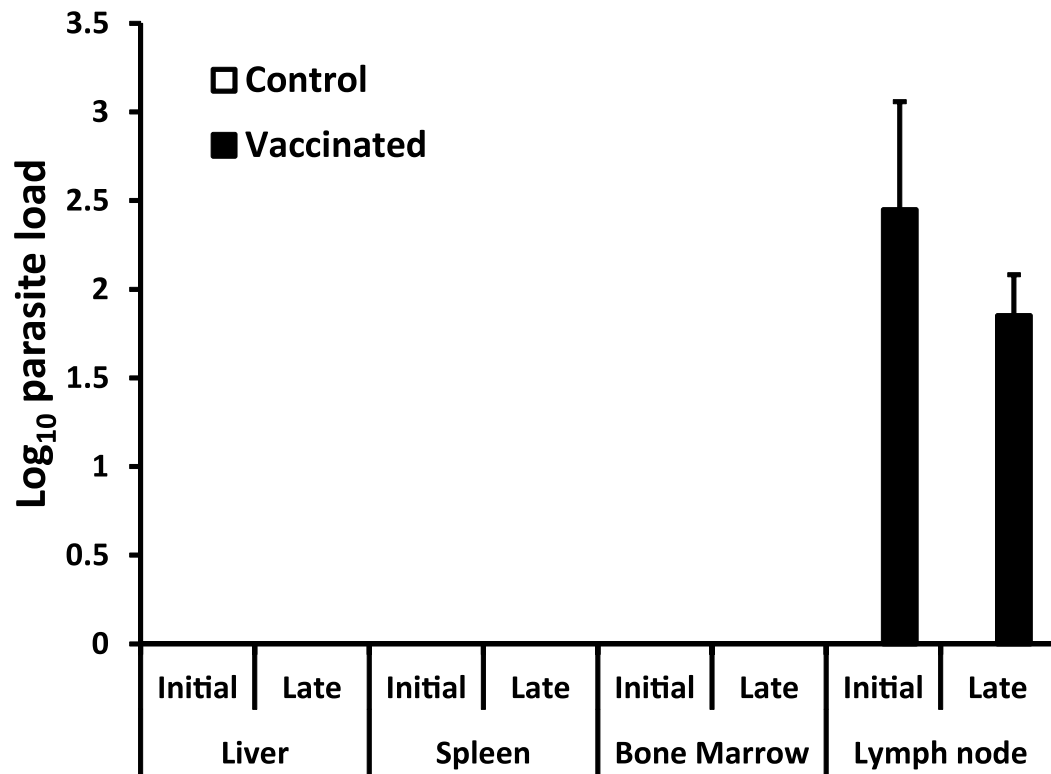

Supplement: s1 [file s1]

(a)

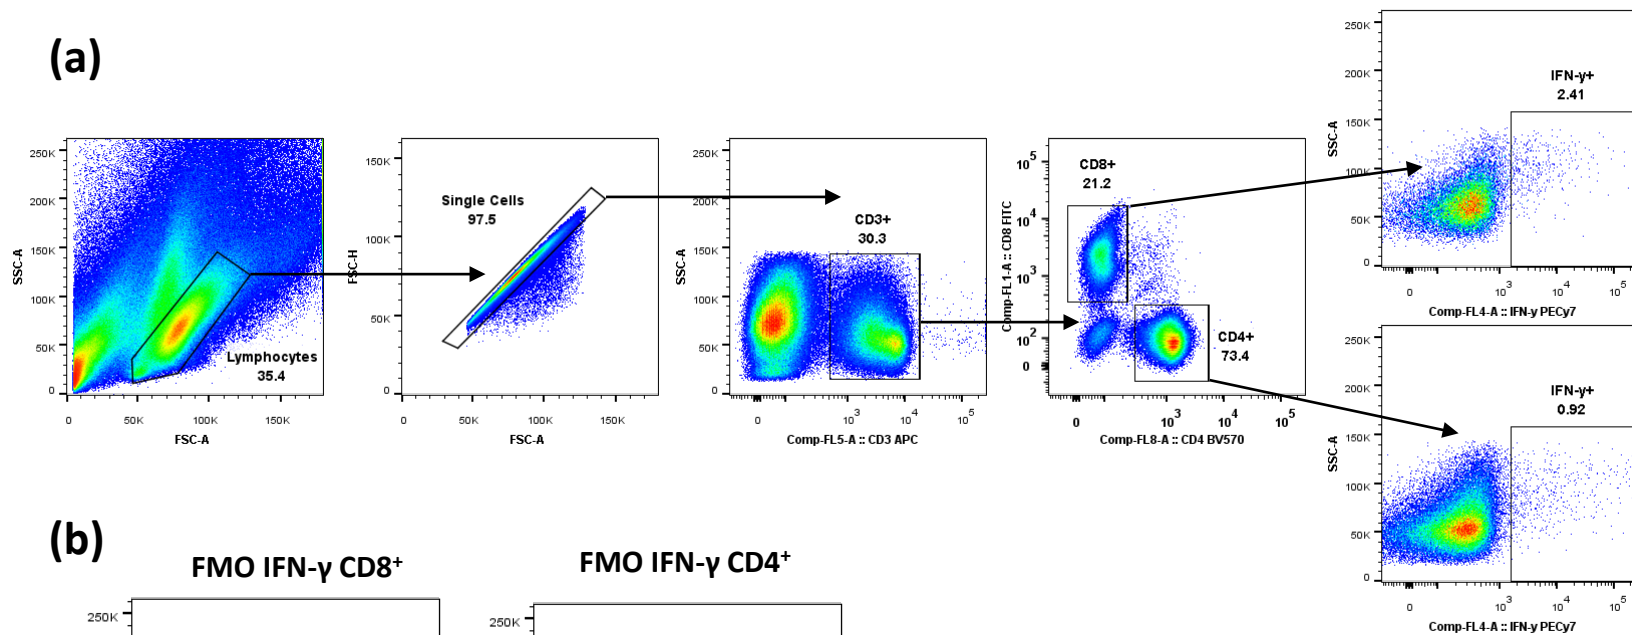

(b)

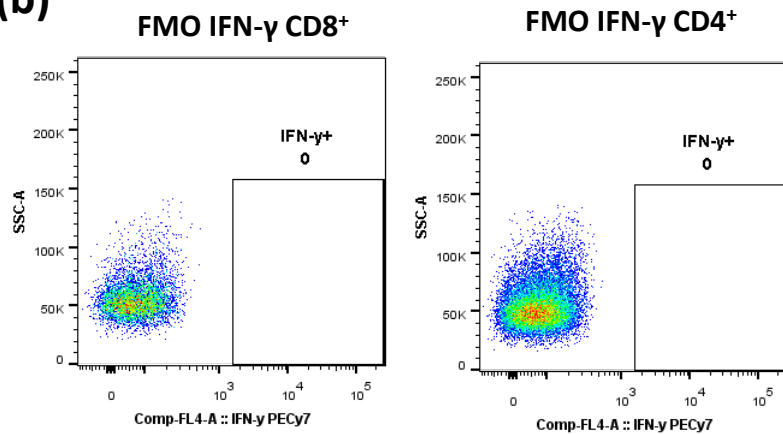

Supplement: s1 [file s1]

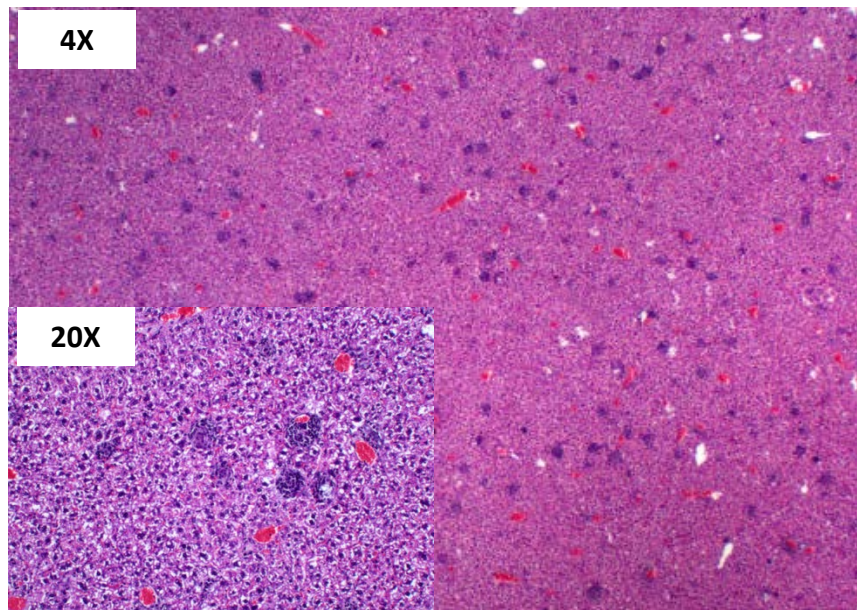

**Control**

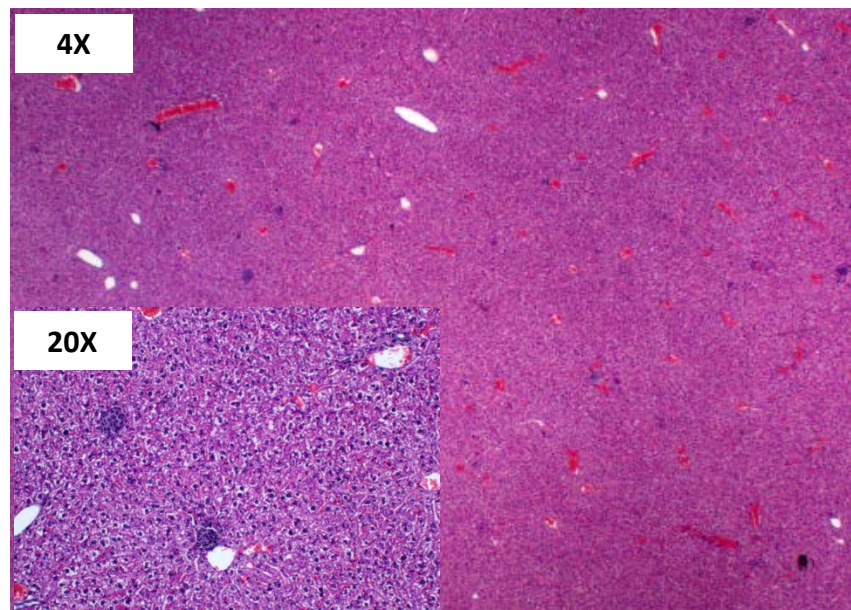

**Vaccinated**

Supplement: s1 [file s1]

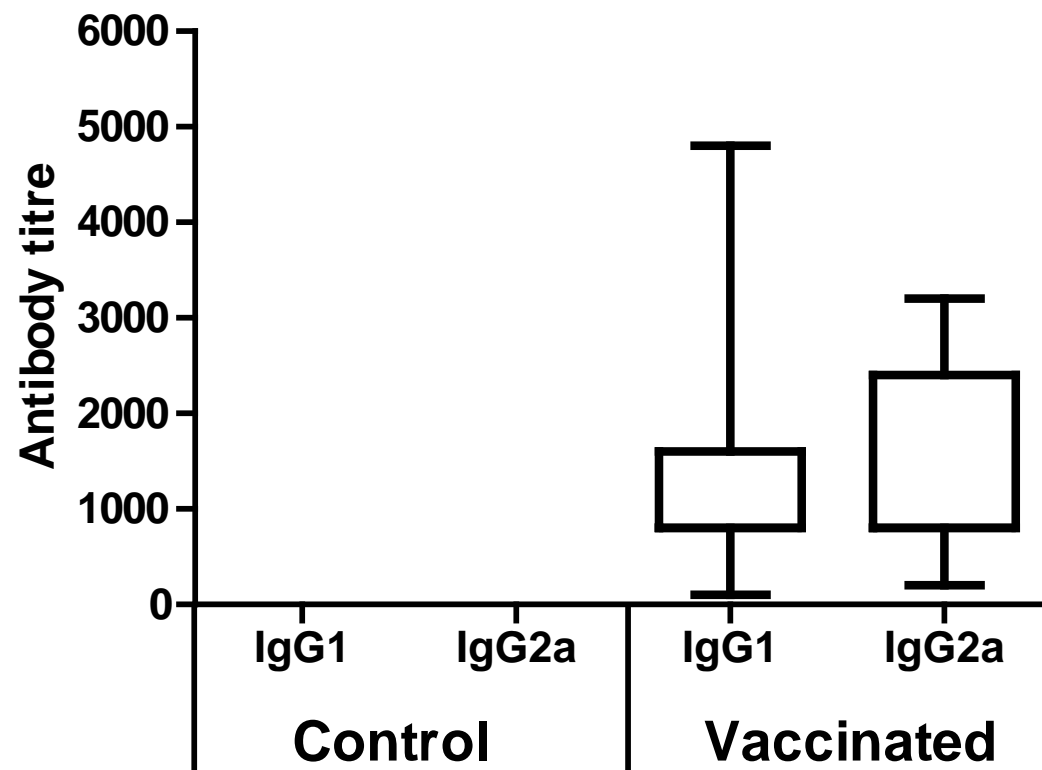

Supplement: s1 [file s1]
